# Supplementary material for: Fuzzy and process modelling of contour ridge water dynamics
Source: Copernicus journal article supplement (doi:10.5194/piahs-378-3-2018), 2018-05-29
Supplement: Supplementary file 1 [file piahs-378-3-2018-supplement.zip]

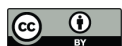

## *Supplement of*

# **Fuzzy and process modelling of contour ridge water dynamics**

**Alexander Mhizha and John Ndiritu**

*Correspondence to:* Alexander Mhizha (amhizha@yahoo.com)

- piahs-378-3-2018-supplement-title-page.pdf
- Underlying Data.docx

The copyright of individual parts of the supplement might differ from the CC BY 4.0 License.
