# Supplementary material for: Fuzzy and process modelling of contour ridge water dynamics
Source: Copernicus journal article supplement (doi:10.5194/piahs-378-3-2018), 2018-05-29
Supplement: Supplementary file 1 [file Underyling Data.docx]

##### Time series input data

| Date | Input data | | Observed soil moisture in loam soil (Field A) (mm/d) | | | | Observed soil moisture in sandy soil (Field B) (mm/d) | | | |
| --- | --- | --- | --- | --- | --- | --- | --- | --- | --- | --- |
| Observed rainfall (mm/d) | Observed pan evaporation (mm/d) | Subplot 1 | Subplot 2 | Subplot 3 | Subplot 4 | Subplot 1 | Subplot 2 | Subplot 3 | Subplot 4 |
| 5-Nov-08 | 0.0 | 2.4 |  |  |  |  |  |  |  |  |
| 6-Nov-08 | 0.0 | 6.3 |  |  |  |  |  |  |  |  |
| 7-Nov-08 | 0.0 | 3.4 |  |  |  |  |  |  |  |  |
| 8-Nov-08 | 0.0 | 5.5 |  |  |  |  |  |  |  |  |
| 9-Nov-08 | 0.0 | 2.8 |  |  |  |  |  |  |  |  |
| 10-Nov-08 | 0.0 | 6.9 |  |  |  |  |  |  |  |  |
| 11-Nov-08 | 0.0 | 3.5 |  |  |  |  |  |  |  |  |
| 12-Nov-08 | 12.0 | 6.2 |  |  |  |  |  |  |  |  |
| 13-Nov-08 | 12.0 | 2.4 |  |  |  |  |  |  |  |  |
| 14-Nov-08 | 20.0 | 1.4 |  |  |  |  |  |  |  |  |
| 15-Nov-08 | 5.0 | 5.3 |  |  |  |  |  |  |  |  |
| 16-Nov-08 | 0.0 | 3.0 |  |  |  |  |  |  |  |  |
| 17-Nov-08 | 0.0 | 1.9 |  |  |  |  |  |  |  |  |
| 18-Nov-08 | 3.0 | 4.7 |  |  |  |  |  |  |  |  |
| 19-Nov-08 | 12.0 | 3.4 |  |  |  |  |  |  |  |  |
| 20-Nov-08 | 24.0 | 4.0 |  |  |  |  |  |  |  |  |
| 21-Nov-08 | 0.0 | 1.2 |  |  |  |  |  |  |  |  |
| 22-Nov-08 | 0.0 | 0.4 |  |  |  |  |  |  |  |  |
| 23-Nov-08 | 20.0 | 9.7 |  |  |  |  |  |  |  |  |
| 24-Nov-08 | 6.0 | 10.5 |  |  |  |  |  |  |  |  |
| 25-Nov-08 | 0.0 | 13.0 |  |  |  |  |  |  |  |  |
| 26-Nov-08 | 0.0 | 3.0 |  |  |  |  |  |  |  |  |
| 27-Nov-08 | 0.0 | 7.3 |  |  |  |  |  |  |  |  |
| 28-Nov-08 | 0.0 | 4.3 |  |  |  |  |  |  |  |  |
| 29-Nov-08 | 0.0 | 12.1 |  |  |  |  |  |  |  |  |
| 30-Nov-08 | 0.0 | 12.3 |  |  |  |  |  |  |  |  |
| 1-Dec-08 | 0.0 | 1.6 |  |  |  |  |  |  |  |  |
| 2-Dec-08 | 0.0 | 2.0 |  |  |  |  |  |  |  |  |
| 3-Dec-08 | 0.0 | 1.5 |  |  |  |  |  |  |  |  |
| 4-Dec-08 | 0.0 | 1.1 |  |  |  |  |  |  |  |  |
| 5-Dec-08 | 0.0 | 7.1 |  |  |  |  |  |  |  |  |
| 6-Dec-08 | 0.0 | 6.6 |  |  |  |  |  |  |  |  |
| 7-Dec-08 | 1.0 | 5.8 |  |  |  |  |  |  |  |  |
| 8-Dec-08 | 0.0 | -0.9 |  |  |  |  |  |  |  |  |
| 9-Dec-08 | 0.0 | 6.4 |  |  |  |  |  |  |  |  |
| 10-Dec-08 | 0.0 | 10.9 |  |  |  |  |  |  |  |  |
| 11-Dec-08 | 0.0 | 0.7 |  |  |  |  |  |  |  |  |
| 12-Dec-08 | 0.0 | 3.9 |  |  |  |  |  |  |  |  |
| 13-Dec-08 | 0.0 | 6.0 |  |  |  |  |  |  |  |  |
| 14-Dec-08 | 0.0 | 3.8 |  |  |  |  |  |  |  |  |
| 15-Dec-08 | 0.0 | 1.6 |  |  |  |  |  |  |  |  |
| 16-Dec-08 | 2.0 | 1.8 |  |  |  |  |  |  |  |  |
| 17-Dec-08 | 1.0 | 7.4 |  |  |  |  |  |  |  |  |
| 18-Dec-08 | 1.0 | 0.5 |  |  |  |  |  |  |  |  |
| 19-Dec-08 | 0.0 | 3.3 |  |  |  |  |  |  |  |  |
| 20-Dec-08 | 0.0 | 3.5 |  |  |  |  |  |  |  |  |
| 21-Dec-08 | 0.0 | 0.2 |  |  |  |  |  |  |  |  |
| 22-Dec-08 | 0.0 | 4.7 |  |  |  |  |  |  |  |  |
| 23-Dec-08 | 0.0 | 1.5 |  |  |  |  |  |  |  |  |
| 24-Dec-08 | 6.0 | 1.2 |  |  |  |  |  |  |  |  |
| 25-Dec-08 | 40.0 | 1.7 |  |  |  |  |  |  |  |  |
| 26-Dec-08 | 12.0 | 3.6 |  |  |  |  |  |  |  |  |
| 27-Dec-08 | 0.0 | 5.5 |  |  |  |  |  |  |  |  |
| 28-Dec-08 | 7.0 | 6.4 |  |  |  |  |  |  |  |  |
| 29-Dec-08 | 0.0 | 1.2 |  |  |  |  |  |  |  |  |
| 30-Dec-08 | 30.0 | 2.5 |  |  |  |  |  |  |  |  |
| 31-Dec-08 | 16.0 | 7.6 |  |  |  |  |  |  |  |  |
| 1-Jan-09 | 0.0 | 4.9 |  |  |  |  |  |  |  |  |
| 2-Jan-09 | 0.0 | 7.2 |  |  |  |  |  |  |  |  |
| 3-Jan-09 | 0.0 | 4.3 |  |  |  |  |  |  |  |  |
| 4-Jan-09 | 0.0 | 3.4 |  |  |  |  |  |  |  |  |
| 5-Jan-09 | 0.0 | 8.2 |  |  |  |  |  |  |  |  |
| 6-Jan-09 | 0.0 | 4.4 |  |  |  |  |  |  |  |  |
| 7-Jan-09 | 0.0 | 7.5 |  |  |  |  |  |  |  |  |
| 8-Jan-09 | 10.0 | 3.3 |  |  |  |  |  |  |  |  |
| 9-Jan-09 | 2.0 | 4.6 |  |  |  |  |  |  |  |  |
| 10-Jan-09 | 4.0 | 4.1 |  |  |  |  |  |  |  |  |
| 11-Jan-09 | 0.0 | 4.1 |  |  |  |  |  |  |  |  |
| 12-Jan-09 | 4.0 | 4.2 |  |  |  |  |  |  |  |  |
| 13-Jan-09 | 0.0 | 2.5 |  |  |  |  |  |  |  |  |
| 14-Jan-09 | 70.0 | 8.8 |  |  |  |  |  |  |  |  |
| 15-Jan-09 | 20.0 | 1.6 |  |  |  |  |  |  |  |  |
| 16-Jan-09 | 30.0 | 3.2 |  |  |  |  |  |  |  |  |
| 17-Jan-09 | 3.0 | 5.8 |  |  |  |  |  |  |  |  |
| 18-Jan-09 | 10.0 | 8.1 |  |  |  |  |  |  |  |  |
| 19-Jan-09 | 6.0 | 3.4 |  |  |  |  |  |  |  |  |
| 20-Jan-09 | 0.0 | 2.3 |  |  |  |  |  |  |  |  |
| 21-Jan-09 | 0.0 | 2.3 |  |  |  |  |  |  |  |  |
| 22-Jan-09 | 0.0 | 2.7 |  |  |  |  |  |  |  |  |
| 23-Jan-09 | 0.0 | 2.2 |  |  |  |  |  |  |  |  |
| 24-Jan-09 | 0.0 | 4.6 |  |  |  |  |  |  |  |  |
| 25-Jan-09 | 0.0 | 4.5 |  |  |  |  |  |  |  |  |
| 26-Jan-09 | 0.0 | 4.0 |  |  |  |  |  |  |  |  |
| 27-Jan-09 | 22.0 | 3.9 |  |  |  |  |  |  |  |  |
| 28-Jan-09 | 0.0 | 5.7 |  |  |  |  |  |  |  |  |
| 29-Jan-09 | 2.0 | 5.5 |  |  |  |  |  |  |  |  |
| 30-Jan-09 | 4.0 | 4.7 |  |  |  |  |  |  |  |  |
| 31-Jan-09 | 0.0 | 6.2 |  |  |  |  |  |  |  |  |
| 1-Feb-09 | 2.0 | 0.6 |  |  |  |  |  |  |  |  |
| 2-Feb-09 | 1.0 | 5.3 |  |  |  |  |  |  |  |  |
| 3-Feb-09 | 5.0 | 5.6 |  |  |  |  |  |  |  |  |
| 4-Feb-09 | 12.0 | 6.1 |  |  |  |  |  |  |  |  |
| 5-Feb-09 | 2.0 | 3.1 |  |  |  |  |  |  |  |  |
| 6-Feb-09 | 16.0 | 8.2 |  |  |  |  |  |  |  |  |
| 7-Feb-09 | 2.0 | 4.2 |  |  |  |  |  |  |  |  |
| 8-Feb-09 | 0.0 | 5.2 |  |  |  |  |  |  |  |  |
| 9-Feb-09 | 0.0 | 4.7 |  |  |  |  |  |  |  |  |
| 10-Feb-09 | 0.0 | 4.6 |  |  |  |  |  |  |  |  |
| 11-Feb-09 | 0.0 | 4.2 |  |  |  |  |  |  |  |  |
| 12-Feb-09 | 0.0 | 3.7 |  |  |  |  |  |  |  |  |
| 13-Feb-09 | 1.0 | 11.2 |  |  |  |  |  |  |  |  |
| 14-Feb-09 | 0.0 | 0.8 |  |  |  |  |  |  |  |  |
| 15-Feb-09 | 0.0 | 3.8 |  |  |  |  |  |  |  |  |
| 16-Feb-09 | 0.0 | 5.6 |  |  |  |  |  |  |  |  |
| 17-Feb-09 | 24.0 | 3.2 |  |  |  |  |  |  |  |  |
| 18-Feb-09 | 38.0 | 8.9 |  |  |  |  |  |  |  |  |
| 19-Feb-09 | 0.0 | 3.2 |  |  |  |  |  |  |  |  |
| 20-Feb-09 | 0.0 | 5.1 |  |  |  |  |  |  |  |  |
| 21-Feb-09 | 0.0 | 7.3 |  |  |  |  |  |  |  |  |
| 22-Feb-09 | 0.0 | 8.4 |  |  |  |  |  |  |  |  |
| 23-Feb-09 | 0.0 | 4.6 |  |  |  |  |  |  |  |  |
| 24-Feb-09 | 30.0 | 3.8 |  |  |  |  |  |  |  |  |
| 25-Feb-09 | 8.0 | 1.7 |  |  |  |  |  |  |  |  |
| 26-Feb-09 | 0.0 | 6.6 |  |  |  |  |  |  |  |  |
| 27-Feb-09 | 0.0 | 2.5 |  |  |  |  |  |  |  |  |
| 28-Feb-09 | 0.0 | 3.9 |  |  |  |  |  |  |  |  |
| 1-Mar-09 | 0.0 | 2.4 |  |  |  |  |  |  |  |  |
| 2-Mar-09 | 0.0 | 2.5 |  |  |  |  |  |  |  |  |
| 3-Mar-09 | 0.0 | 5.1 |  |  |  |  |  |  |  |  |
| 4-Mar-09 | 0.0 | 4.3 |  |  |  |  |  |  |  |  |
| 5-Mar-09 | 0.0 | 7.6 |  |  |  |  |  |  |  |  |
| 6-Mar-09 | 4.0 | 3.2 |  |  |  |  |  |  |  |  |
| 7-Mar-09 | 0.0 | 6.0 |  |  |  |  |  |  |  |  |
| 8-Mar-09 | 0.0 | 9.0 |  |  |  |  |  |  |  |  |
| 9-Mar-09 | 0.0 | 4.3 |  |  |  |  |  |  |  |  |
| 10-Mar-09 | 0.0 | 8.0 |  |  |  |  |  |  |  |  |
| 11-Mar-09 | 0.0 | 5.9 |  |  |  |  |  |  |  |  |
| 12-Mar-09 | 7.0 | 5.7 |  |  |  |  |  |  |  |  |
| 13-Mar-09 | 16.0 | -2.0 |  |  |  |  |  |  |  |  |
| 14-Mar-09 | 0.0 | 5.3 |  |  |  |  |  |  |  |  |
| 15-Mar-09 | 0.0 | 3.4 |  |  |  |  |  |  |  |  |
| 16-Mar-09 | 0.0 | 1.0 |  |  |  |  |  |  |  |  |
| 17-Mar-09 | 0.0 | 0.3 |  |  |  |  |  |  |  |  |
| 18-Mar-09 | 0.0 | 9.6 |  |  |  |  |  |  |  |  |
| 19-Mar-09 | 10.0 | 1.1 |  |  |  |  |  |  |  |  |
| 20-Mar-09 | 0.0 | 7.4 |  |  |  |  |  |  |  |  |
| 21-Mar-09 | 0.0 | 1.1 |  |  |  |  |  |  |  |  |
| 22-Mar-09 | 0.0 | 0.5 |  |  |  |  |  |  |  |  |
| 23-Mar-09 | 0.0 | 0.6 |  |  |  |  |  |  |  |  |
| 24-Mar-09 | 0.0 | 1.7 |  |  |  |  |  |  |  |  |
| 25-Mar-09 | 0.0 | 4.6 |  |  |  |  |  |  |  |  |
| 26-Mar-09 | 0.0 | 3.2 |  |  |  |  |  |  |  |  |
| 27-Mar-09 | 0.0 | 4.3 |  |  |  |  |  |  |  |  |
| 28-Mar-09 | 0.0 | 2.2 |  |  |  |  |  |  |  |  |
| 29-Mar-09 | 0.0 | 2.6 |  |  |  |  |  |  |  |  |
| 30-Mar-09 | 6.0 | 2.1 |  |  |  |  |  |  |  |  |
| 31-Mar-09 | 7.0 | 3.6 |  |  |  |  |  |  |  |  |
| 1-Apr-09 | 0.0 | 1.7 |  |  |  |  |  |  |  |  |
| 2-Apr-09 | 0.0 | 1.4 |  |  |  |  |  |  |  |  |
| 3-Apr-09 | 0.0 | 6.1 |  |  |  |  |  |  |  |  |
| 4-Apr-09 | 0.0 | 1.4 |  |  |  |  |  |  |  |  |
| 5-Apr-09 | 0.0 | 2.4 |  |  |  |  |  |  |  |  |
| 6-Apr-09 | 0.0 | 6.3 |  |  |  |  |  |  |  |  |
| 7-Apr-09 | 0.0 | 3.4 |  |  |  |  |  |  |  |  |
| 8-Apr-09 | 0.0 | 5.5 |  |  |  |  |  |  |  |  |
| 9-Apr-09 | 0.0 | 2.8 |  |  |  |  |  |  |  |  |
| 10-Apr-09 | 0.0 | 6.9 |  |  |  |  |  |  |  |  |
| 11-Apr-09 | 0.0 | 3.5 |  |  |  |  |  |  |  |  |
| 12-Apr-09 | 0.0 | 6.2 |  |  |  |  |  |  |  |  |
| 13-Apr-09 | 0.0 | 2.4 |  |  |  |  |  |  |  |  |
| 14-Apr-09 | 0.0 | 1.4 |  |  |  |  |  |  |  |  |
| 15-Apr-09 | 0.0 | 5.3 |  |  |  |  |  |  |  |  |
| 16-Apr-09 | 0.0 | 3.0 |  |  |  |  |  |  |  |  |
| 17-Apr-09 | 0.0 | 1.9 |  |  |  |  |  |  |  |  |
| 18-Apr-09 | 0.0 | 4.7 |  |  |  |  |  |  |  |  |
| 19-Apr-09 | 0.0 | 3.4 |  |  |  |  |  |  |  |  |
| 20-Apr-09 | 0.0 | 4.0 |  |  |  |  |  |  |  |  |
| 21-Apr-09 | 0.0 | 1.2 |  |  |  |  |  |  |  |  |
| 22-Apr-09 | 0.0 | 0.4 |  |  |  |  |  |  |  |  |
| 23-Apr-09 | 0.0 | 9.7 |  |  |  |  |  |  |  |  |
| 24-Apr-09 | 0.0 | 10.5 |  |  |  |  |  |  |  |  |
| 25-Apr-09 | 0.0 | 13.0 |  |  |  |  |  |  |  |  |
| 26-Apr-09 | 0.0 | 3.0 |  |  |  |  |  |  |  |  |
| 27-Apr-09 | 0.0 | 7.3 |  |  |  |  |  |  |  |  |
| 28-Apr-09 | 0.0 | 4.3 |  |  |  |  |  |  |  |  |
| 29-Apr-09 | 0.0 | 12.1 |  |  |  |  |  |  |  |  |
| 30-Apr-09 | 0.0 | 12.3 |  |  |  |  |  |  |  |  |
| 1-May-09 | 0.0 | 1.6 |  |  |  |  |  |  |  |  |
| 2-May-09 | 0.0 | 2.0 |  |  |  |  |  |  |  |  |
| 3-May-09 | 1.0 | 1.5 |  |  |  |  |  |  |  |  |
| 4-May-09 | 10.0 | 1.1 |  |  |  |  |  |  |  |  |
| 5-May-09 | 0.0 | 7.1 |  |  |  |  |  |  |  |  |
| 6-May-09 | 0.0 | 6.6 |  |  |  |  |  |  |  |  |
| 7-May-09 | 0.0 | 5.8 |  |  |  |  |  |  |  |  |
| 8-May-09 | 0.0 | -0.9 |  |  |  |  |  |  |  |  |
| 9-May-09 | 0.0 | 6.4 |  |  |  |  |  |  |  |  |
| 10-May-09 | 0.0 | 10.9 |  |  |  |  |  |  |  |  |
| 11-May-09 | 0.0 | 0.7 |  |  |  |  |  |  |  |  |
| 12-May-09 | 0.0 | 3.9 |  |  |  |  |  |  |  |  |
| 13-May-09 | 0.0 | 6.0 |  |  |  |  |  |  |  |  |
| 14-May-09 | 0.0 | 3.8 |  |  |  |  |  |  |  |  |
| 15-May-09 | 0.0 | 1.6 |  |  |  |  |  |  |  |  |
| 16-May-09 | 0.0 | 1.8 |  |  |  |  |  |  |  |  |
| 17-May-09 | 0.0 | 7.4 |  |  |  |  |  |  |  |  |
| 18-May-09 | 0.0 | 0.5 |  |  |  |  |  |  |  |  |
| 19-May-09 | 0.0 | 3.3 |  |  |  |  |  |  |  |  |
| 20-May-09 | 0.0 | 3.5 |  |  |  |  |  |  |  |  |
| 21-May-09 | 0.0 | 0.2 |  |  |  |  |  |  |  |  |
| 22-May-09 | 0.0 | 4.7 |  |  |  |  |  |  |  |  |
| 23-May-09 | 0.0 | 1.5 |  |  |  |  |  |  |  |  |
| 24-May-09 | 0.0 | 1.2 |  |  |  |  |  |  |  |  |
| 25-May-09 | 0.0 | 1.7 | 12.5 | 10.5 | 8.8 | 10.6 | 8.2 | 8.5 | 9.0 | 8.2 |
| 26-May-09 | 0.0 | 3.6 |  |  |  |  |  |  |  |  |
| 27-May-09 | 0.0 | 5.5 |  |  |  |  |  |  |  |  |
| 28-May-09 | 0.0 | 6.4 |  |  |  |  |  |  |  |  |
| 29-May-09 | 0.0 | 1.2 |  |  |  |  |  |  |  |  |
| 30-May-09 | 0.0 | 2.5 |  |  |  |  |  |  |  |  |
| 31-May-09 | 0.0 | 7.6 |  |  |  |  |  |  |  |  |
| 1-Jun-09 | 0.0 | 4.9 |  |  |  |  |  |  |  |  |
| 2-Jun-09 | 0.0 | 7.2 |  |  |  |  |  |  |  |  |
| 3-Jun-09 | 0.0 | 4.3 |  |  |  |  |  |  |  |  |
| 4-Jun-09 | 0.0 | 3.4 |  |  |  |  |  |  |  |  |
| 5-Jun-09 | 0.0 | 8.2 |  |  |  |  |  |  |  |  |
| 6-Jun-09 | 0.0 | 4.4 |  |  |  |  |  |  |  |  |
| 7-Jun-09 | 0.0 | 7.5 |  |  |  |  | 6.3 | 7.0 | 7.5 | 6.6 |
| 8-Jun-09 | 0.0 | 3.3 |  |  |  |  |  |  |  |  |
| 9-Jun-09 | 0.0 | 4.6 |  |  |  |  |  |  |  |  |
| 10-Jun-09 | 4.0 | 4.1 |  |  |  |  |  |  |  |  |
| 11-Jun-09 | 0.0 | 4.1 |  |  |  |  |  |  |  |  |
| 12-Jun-09 | 0.0 | 4.2 |  |  |  |  |  |  |  |  |
| 13-Jun-09 | 0.0 | 2.5 |  |  |  |  |  |  |  |  |
| 14-Jun-09 | 0.0 | 8.8 |  |  |  |  |  |  |  |  |
| 15-Jun-09 | 0.0 | 1.6 |  |  |  |  |  |  |  |  |
| 16-Jun-09 | 0.0 | 3.2 |  |  |  |  |  |  |  |  |
| 17-Jun-09 | 0.0 | 5.8 |  |  |  |  |  |  |  |  |
| 18-Jun-09 | 0.0 | 8.1 |  |  |  |  |  |  |  |  |
| 19-Jun-09 | 0.0 | 3.4 |  |  |  |  |  |  |  |  |
| 20-Jun-09 | 0.0 | 2.3 |  |  |  |  |  |  |  |  |
| 21-Jun-09 | 0.0 | 2.3 |  |  |  |  |  |  |  |  |
| 22-Jun-09 | 0.0 | 2.7 | 10.2 | 9.6 | 8.0 | 9.7 |  |  |  |  |
| 23-Jun-09 | 0.0 | 2.2 |  |  |  |  |  |  |  |  |
| 24-Jun-09 | 0.0 | 4.6 |  |  |  |  |  |  |  |  |
| 25-Jun-09 | 0.0 | 4.5 |  |  |  |  |  |  |  |  |
| 26-Jun-09 | 0.0 | 4.0 |  |  |  |  |  |  |  |  |
| 27-Jun-09 | 0.0 | 3.9 |  |  |  |  |  |  |  |  |
| 28-Jun-09 | 0.0 | 5.7 |  |  |  |  |  |  |  |  |
| 29-Jun-09 | 0.0 | 5.5 |  |  |  |  |  |  |  |  |
| 30-Jun-09 | 0.0 | 4.7 |  |  |  |  |  |  |  |  |
| 1-Jul-09 | 0.0 | 6.2 |  |  |  |  |  |  |  |  |
| 2-Jul-09 | 0.0 | 0.6 |  |  |  |  |  |  |  |  |
| 3-Jul-09 | 0.0 | 5.3 |  |  |  |  |  |  |  |  |
| 4-Jul-09 | 0.0 | 5.6 |  |  |  |  |  |  |  |  |
| 5-Jul-09 | 2.0 | 6.1 |  |  |  |  |  |  |  |  |
| 6-Jul-09 | 0.0 | 3.1 | 9.9 | 9.0 | 7.5 | 9.4 |  |  |  |  |
| 7-Jul-09 | 0.0 | 8.2 |  |  |  |  |  |  |  |  |
| 8-Jul-09 | 0.0 | 4.2 |  |  |  |  |  |  |  |  |
| 9-Jul-09 | 0.0 | 5.2 |  |  |  |  |  |  |  |  |
| 10-Jul-09 | 0.0 | 4.7 |  |  |  |  |  |  |  |  |
| 11-Jul-09 | 0.0 | 4.6 |  |  |  |  |  |  |  |  |
| 12-Jul-09 | 0.0 | 4.2 |  |  |  |  |  |  |  |  |
| 13-Jul-09 | 0.0 | 3.7 |  |  |  |  |  |  |  |  |
| 14-Jul-09 | 0.0 | 11.2 |  |  |  |  |  |  |  |  |
| 15-Jul-09 | 0.0 | 0.8 |  |  |  |  |  |  |  |  |
| 16-Jul-09 | 0.0 | 3.8 |  |  |  |  |  |  |  |  |
| 17-Jul-09 | 0.0 | 5.6 |  |  |  |  |  |  |  |  |
| 18-Jul-09 | 0.0 | 3.2 |  |  |  |  |  |  |  |  |
| 19-Jul-09 | 0.0 | 8.9 |  |  |  |  |  |  |  |  |
| 20-Jul-09 | 0.0 | 3.2 |  |  |  |  |  |  |  |  |
| 21-Jul-09 | 0.0 | 5.1 |  |  |  |  |  |  |  |  |
| 22-Jul-09 | 0.0 | 7.3 |  |  |  |  |  |  |  |  |
| 23-Jul-09 | 0.0 | 8.4 |  |  |  |  |  |  |  |  |
| 24-Jul-09 | 0.0 | 4.6 |  |  |  |  |  |  |  |  |
| 25-Jul-09 | 0.0 | 3.8 |  |  |  |  |  |  |  |  |
| 26-Jul-09 | 0.0 | 1.7 |  |  |  |  |  |  |  |  |
| 27-Jul-09 | 0.0 | 6.6 |  |  |  |  |  |  |  |  |
| 28-Jul-09 | 0.0 | 2.5 |  |  |  |  |  |  |  |  |
| 29-Jul-09 | 0.0 | 3.9 |  |  |  |  |  |  |  |  |
| 30-Jul-09 | 0.0 | 2.4 |  |  |  |  |  |  |  |  |
| 31-Jul-09 | 0.0 | 2.5 |  |  |  |  |  |  |  |  |
| 1-Aug-09 | 0.0 | 5.1 |  |  |  |  |  |  |  |  |
| 2-Aug-09 | 0.0 | 4.3 |  |  |  |  |  |  |  |  |
| 3-Aug-09 | 0.0 | 7.6 |  |  |  |  |  |  |  |  |
| 4-Aug-09 | 0.0 | 3.2 |  |  |  |  |  |  |  |  |
| 5-Aug-09 | 0.0 | 6.0 |  |  |  |  |  |  |  |  |
| 6-Aug-09 | 0.0 | 9.0 |  |  |  |  |  |  |  |  |
| 7-Aug-09 | 0.0 | 4.3 |  |  |  |  |  |  |  |  |
| 8-Aug-09 | 0.0 | 8.0 |  |  |  |  |  |  |  |  |
| 9-Aug-09 | 0.0 | 5.9 |  |  |  |  |  |  |  |  |
| 10-Aug-09 | 0.0 | 5.7 |  |  |  |  |  |  |  |  |
| 11-Aug-09 | 0.0 | -2.0 |  |  |  |  |  |  |  |  |
| 12-Aug-09 | 0.0 | 5.3 |  |  |  |  |  |  |  |  |
| 13-Aug-09 | 0.0 | 3.4 |  |  |  |  |  |  |  |  |
| 14-Aug-09 | 0.0 | 1.0 |  |  |  |  |  |  |  |  |
| 15-Aug-09 | 0.0 | 0.3 |  |  |  |  |  |  |  |  |
| 16-Aug-09 | 0.0 | 9.6 |  |  |  |  |  |  |  |  |
| 17-Aug-09 | 0.0 | 1.1 | 9.5 | 8.3 | 7.1 | 8.6 |  |  |  |  |
| 18-Aug-09 | 0.0 | 7.4 |  |  |  |  |  |  |  |  |
| 19-Aug-09 | 0.0 | 1.1 |  |  |  |  |  |  |  |  |
| 20-Aug-09 | 0.0 | 0.5 |  |  |  |  | 5.4 | 6.4 | 6.3 | 5.5 |
| 21-Aug-09 | 0.0 | 0.6 |  |  |  |  |  |  |  |  |
| 22-Aug-09 | 0.0 | 1.7 |  |  |  |  |  |  |  |  |
| 23-Aug-09 | 0.0 | 4.6 |  |  |  |  |  |  |  |  |
| 24-Aug-09 | 0.0 | 3.2 |  |  |  |  |  |  |  |  |
| 25-Aug-09 | 0.0 | 4.3 | 9.6 | 8.2 | 7.2 | 8.9 |  |  |  |  |
| 26-Aug-09 | 0.0 | 2.2 |  |  |  |  |  |  |  |  |
| 27-Aug-09 | 0.0 | 2.6 |  |  |  |  | 5.9 | 6.5 | 6.4 | 5.9 |
| 28-Aug-09 | 0.0 | 2.1 |  |  |  |  |  |  |  |  |
| 29-Aug-09 | 0.0 | 3.6 |  |  |  |  |  |  |  |  |
| 30-Aug-09 | 0.0 | 1.7 |  |  |  |  |  |  |  |  |
| 31-Aug-09 | 0.0 | 1.4 |  |  |  |  |  |  |  |  |
| 1-Sep-09 | 0.0 | 6.1 |  |  |  |  |  |  |  |  |
| 2-Sep-09 | 0.0 | 1.4 |  |  |  |  |  |  |  |  |
| 3-Sep-09 | 0.0 | 2.4 |  |  |  |  |  |  |  |  |
| 4-Sep-09 | 0.0 | 6.3 |  |  |  |  |  |  |  |  |
| 5-Sep-09 | 0.0 | 3.4 |  |  |  |  |  |  |  |  |
| 6-Sep-09 | 0.0 | 5.5 |  |  |  |  |  |  |  |  |
| 7-Sep-09 | 0.0 | 2.8 |  |  |  |  |  |  |  |  |
| 8-Sep-09 | 0.0 | 6.9 | 8.7 | 7.4 | 6.19 | 7.9 |  |  |  |  |
| 9-Sep-09 | 0.0 | 3.5 |  |  |  |  |  |  |  |  |
| 10-Sep-09 | 0.0 | 6.2 |  |  |  |  |  |  |  |  |
| 11-Sep-09 | 0.0 | 2.4 |  |  |  |  |  |  |  |  |
| 12-Sep-09 | 0.0 | 1.4 |  |  |  |  |  |  |  |  |
| 13-Sep-09 | 0.0 | 5.3 |  |  |  |  |  |  |  |  |
| 14-Sep-09 | 0.0 | 3.0 |  |  |  |  |  |  |  |  |
| 15-Sep-09 | 0.0 | 1.9 |  |  |  |  |  |  |  |  |
| 16-Sep-09 | 0.0 | 4.7 |  |  |  |  |  |  |  |  |
| 17-Sep-09 | 0.0 | 3.4 |  |  |  |  |  |  |  |  |
| 18-Sep-09 | 0.0 | 4.0 |  |  |  |  |  |  |  |  |
| 19-Sep-09 | 0.0 | 1.2 |  |  |  |  |  |  |  |  |
| 20-Sep-09 | 0.0 | 0.4 |  |  |  |  |  |  |  |  |
| 21-Sep-09 | 0.0 | 9.7 |  |  |  |  |  |  |  |  |
| 22-Sep-09 | 0.0 | 10.5 |  |  |  |  |  |  |  |  |
| 23-Sep-09 | 0.0 | 13.0 |  |  |  |  |  |  |  |  |
| 24-Sep-09 | 0.0 | 3.0 | 8.8 | 7.3 | 6.65 | 8.0 |  |  |  |  |
| 25-Sep-09 | 0.0 | 7.3 |  |  |  |  |  |  |  |  |
| 26-Sep-09 | 0.0 | 4.3 |  |  |  |  | 3.7 | 4.6 | 5.3 | 4.2 |
| 27-Sep-09 | 0.0 | 12.1 |  |  |  |  |  |  |  |  |
| 28-Sep-09 | 0.0 | 12.3 |  |  |  |  |  |  |  |  |
| 29-Sep-09 | 0.0 | 1.6 |  |  |  |  |  |  |  |  |
| 30-Sep-09 | 0.0 | 2.0 |  |  |  |  |  |  |  |  |
| 1-Oct-09 | 0.0 | 1.5 |  |  |  |  |  |  |  |  |
| 2-Oct-09 | 0.0 | 1.1 |  |  |  |  |  |  |  |  |
| 3-Oct-09 | 0.0 | 7.1 | 8.1 | 6.8 | 5.90 | 7.4 | 4.0 | 4.7 | 5.6 | 4.4 |
| 4-Oct-09 | 0.0 | 6.6 |  |  |  |  |  |  |  |  |
| 5-Oct-09 | 0.0 | 5.8 |  |  |  |  |  |  |  |  |
| 6-Oct-09 | 0.0 | -0.9 |  |  |  |  |  |  |  |  |
| 7-Oct-09 | 0.0 | 6.4 |  |  |  |  |  |  |  |  |
| 8-Oct-09 | 0.0 | 10.9 |  |  |  |  |  |  |  |  |
| 9-Oct-09 | 0.0 | 0.7 | 9.1 | 7.8 | 7.20 | 8.2 |  |  |  |  |
| 10-Oct-09 | 0.0 | 3.9 |  |  |  |  |  |  |  |  |
| 11-Oct-09 | 0.0 | 6.0 |  |  |  |  |  |  |  |  |
| 12-Oct-09 | 0.0 | 3.8 |  |  |  |  |  |  |  |  |
| 13-Oct-09 | 0.0 | 1.6 |  |  |  |  |  |  |  |  |
| 14-Oct-09 | 0.0 | 1.8 |  |  |  |  |  |  |  |  |
| 15-Oct-09 | 0.0 | 7.4 |  |  |  |  |  |  |  |  |
| 16-Oct-09 | 0.0 | 0.5 | 8.5 | 6.0 | 6.20 | 7.4 |  |  |  |  |
| 17-Oct-09 | 0.0 | 3.3 |  |  |  |  | 4.5 | 5.3 | 5.5 | 4.7 |
| 18-Oct-09 | 0.0 | 3.5 |  |  |  |  |  |  |  |  |
| 19-Oct-09 | 0.0 | 0.2 |  |  |  |  |  |  |  |  |
| 20-Oct-09 | 0.0 | 4.7 |  |  |  |  |  |  |  |  |
| 21-Oct-09 | 0.0 | 1.5 |  |  |  |  |  |  |  |  |
| 22-Oct-09 | 0.0 | 1.2 |  |  |  |  |  |  |  |  |
| 23-Oct-09 | 0.0 | 1.7 |  |  |  |  |  |  |  |  |
| 24-Oct-09 | 0.0 | 3.6 |  |  |  |  |  |  |  |  |
| 25-Oct-09 | 0.0 | 5.5 |  |  |  |  |  |  |  |  |
| 26-Oct-09 | 0.0 | 6.4 |  |  |  |  |  |  |  |  |
| 27-Oct-09 | 0.0 | 1.2 |  |  |  |  |  |  |  |  |
| 28-Oct-09 | 0.0 | 2.5 |  |  |  |  |  |  |  |  |
| 29-Oct-09 | 0.0 | 7.6 |  |  |  |  |  |  |  |  |
| 30-Oct-09 | 0.0 | 4.9 |  |  |  |  |  |  |  |  |
| 31-Oct-09 | 14.0 | 7.2 |  |  |  |  |  |  |  |  |
| 1-Nov-09 | 0.0 | 4.3 |  |  |  |  |  |  |  |  |
| 2-Nov-09 | 0.0 | 3.4 |  |  |  |  |  |  |  |  |
| 3-Nov-09 | 0.0 | 8.2 |  |  |  |  |  |  |  |  |
| 4-Nov-09 | 0.0 | 4.4 |  |  |  |  |  |  |  |  |
| 5-Nov-09 | 0.0 | 7.5 | 14.0 | 8.4 | 9.50 | 9.8 | 5.1 | 5.1 | 5.9 | 4.5 |
| 6-Nov-09 | 0.0 | 3.3 |  |  |  |  |  |  |  |  |
| 7-Nov-09 | 0.0 | 4.6 |  |  |  |  |  |  |  |  |
| 8-Nov-09 | 0.0 | 4.1 |  |  |  |  |  |  |  |  |
| 9-Nov-09 | 0.0 | 4.1 |  |  |  |  |  |  |  |  |
| 10-Nov-09 | 0.0 | 4.2 |  |  |  |  |  |  |  |  |
| 11-Nov-09 | 0.0 | 2.5 |  |  |  |  |  |  |  |  |
| 12-Nov-09 | 0.0 | 8.8 |  |  |  |  |  |  |  |  |
| 13-Nov-09 | 2.0 | 1.6 |  |  |  |  |  |  |  |  |
| 14-Nov-09 | 0.0 | 3.2 |  |  |  |  |  |  |  |  |
| 15-Nov-09 | 0.0 | 5.8 |  |  |  |  |  |  |  |  |
| 16-Nov-09 | 2.0 | 8.1 |  |  |  |  |  |  |  |  |
| 17-Nov-09 | 0.0 | 3.4 | 10.7 | 7.8 | 7.66 | 8.7 |  |  |  |  |
| 18-Nov-09 | 0.0 | 2.3 |  |  |  |  |  |  |  |  |
| 19-Nov-09 | 0.0 | 2.3 |  |  |  |  |  |  |  |  |
| 20-Nov-09 | 10.0 | 2.7 |  |  |  |  |  |  |  |  |
| 21-Nov-09 | 24.0 | 2.2 |  |  |  |  |  |  |  |  |
| 22-Nov-09 | 0.0 | 4.6 |  |  |  |  |  |  |  |  |
| 23-Nov-09 | 0.0 | 4.5 |  |  |  |  |  |  |  |  |
| 24-Nov-09 | 0.0 | 4.0 | 12.9 | 12.2 | 11.63 | 12.3 |  |  |  |  |
| 25-Nov-09 | 0.0 | 3.9 |  |  |  |  |  |  |  |  |
| 26-Nov-09 | 0.0 | 5.7 | 10.5 | 11.7 | 10.91 | 12.9 |  |  |  |  |
| 27-Nov-09 | 0.0 | 5.5 |  |  |  |  | 10.6 | 8.6 | 10.4 | 8.9 |
| 28-Nov-09 | 0.0 | 4.7 |  |  |  |  | 10.2 | 8.6 | 9.6 | 9.0 |
| 29-Nov-09 | 0.0 | 6.2 |  |  |  |  |  |  |  |  |
| 30-Nov-09 | 0.0 | 0.6 |  |  |  |  |  |  |  |  |
| 1-Dec-09 | 2.0 | 5.3 |  |  |  |  |  |  |  |  |
| 2-Dec-09 | 16.0 | 5.6 |  |  |  |  |  |  |  |  |
| 3-Dec-09 | 0.0 | 6.1 |  |  |  |  |  |  |  |  |
| 4-Dec-09 | 24.0 | 3.1 |  |  |  |  |  |  |  |  |
| 5-Dec-09 | 0.0 | 8.2 |  |  |  |  |  |  |  |  |
| 6-Dec-09 | 0.0 | 4.2 |  |  |  |  |  |  |  |  |
| 7-Dec-09 | 0.0 | 5.2 | 14.6 | 13.7 | 11.42 | 15.0 |  |  |  |  |
| 8-Dec-09 | 3.0 | 4.7 |  |  |  |  | 16.4 | 13.2 | 14.4 | 13.6 |
| 9-Dec-09 | 0.0 | 4.6 |  |  |  |  |  |  |  |  |
| 10-Dec-09 | 0.0 | 4.2 | 14.4 | 13.3 | 12.59 | 14.4 |  |  |  |  |
| 11-Dec-09 | 3.0 | 3.7 |  |  |  |  |  |  |  |  |
| 12-Dec-09 | 80.0 | 11.2 |  |  |  |  |  |  |  |  |
| 13-Dec-09 | 0.0 | 0.8 |  |  |  |  |  |  |  |  |
| 14-Dec-09 | 0.0 | 3.8 | 17.2 | 15.6 | 14.48 | 17.9 | 21.9 | 18.7 | 19.0 | 18.9 |
| 15-Dec-09 | 0.0 | 5.6 |  |  |  |  |  |  |  |  |
| 16-Dec-09 | 0.0 | 3.2 |  |  |  |  |  |  |  |  |
| 17-Dec-09 | 0.0 | 8.9 | 17.0 | 13.9 | 14.98 | 16.1 |  |  |  |  |
| 18-Dec-09 | 3.0 | 3.2 |  |  |  |  |  |  |  |  |
| 19-Dec-09 | 0.0 | 5.1 |  |  |  |  |  |  |  |  |
| 20-Dec-09 | 0.0 | 7.3 |  |  |  |  |  |  |  |  |
| 21-Dec-09 | 0.0 | 8.4 |  |  |  |  |  |  |  |  |
| 22-Dec-09 | 0.0 | 4.6 |  |  |  |  |  |  |  |  |
| 23-Dec-09 | 0.0 | 3.8 |  |  |  |  |  |  |  |  |
| 24-Dec-09 | 0.0 | 1.7 |  |  |  |  |  |  |  |  |
| 25-Dec-09 | 0.0 | 6.6 |  |  |  |  |  |  |  |  |
| 26-Dec-09 | 0.0 | 2.5 |  |  |  |  |  |  |  |  |
| 27-Dec-09 | 0.0 | 3.9 |  |  |  |  |  |  |  |  |
| 28-Dec-09 | 0.0 | 2.4 |  |  |  |  |  |  |  |  |
| 29-Dec-09 | 0.0 | 2.5 |  |  |  |  |  |  |  |  |
| 30-Dec-09 | 0.0 | 5.1 |  |  |  |  |  |  |  |  |
| 31-Dec-09 | 0.0 | 4.3 |  |  |  |  |  |  |  |  |
| 1-Jan-10 | 0.0 | 7.6 |  |  |  |  |  |  |  |  |
| 2-Jan-10 | 0.0 | 3.2 |  |  |  |  |  |  |  |  |
| 3-Jan-10 | 0.0 | 6.0 |  |  |  |  |  |  |  |  |
| 4-Jan-10 | 0.0 | 9.0 |  |  |  |  |  |  |  |  |
| 5-Jan-10 | 56.0 | 4.3 | 20.0 | 17.0 | 18.35 | 19.2 | 24.1 | 20.7 | 23.1 | 20.9 |
| 6-Jan-10 | 1.0 | 8.0 |  |  |  |  |  |  |  |  |
| 7-Jan-10 | 0.0 | 5.9 |  |  |  |  |  |  |  |  |
| 8-Jan-10 | 0.0 | 5.7 | 17.6 | 14.5 | 14.88 | 17.1 | 23.2 | 20.8 | 21.1 | 20.6 |
| 9-Jan-10 | 0.0 | -2.0 | 17.3 | 14.6 | 15.26 | 16.8 | 21.8 | 19.3 | 20.4 | 19.6 |
| 10-Jan-10 | 0.0 | 5.3 |  |  |  |  |  |  |  |  |
| 11-Jan-10 | 0.0 | 3.4 | 16.1 | 13.2 | 13.21 | 16.0 | 19.6 | 19.3 | 19.6 | 18.4 |
| 12-Jan-10 | 0.0 | 1.0 |  |  |  |  |  |  |  |  |
| 13-Jan-10 | 0.0 | 0.3 |  |  |  |  |  |  |  |  |
| 14-Jan-10 | 0.0 | 9.6 |  |  |  |  |  |  |  |  |
| 15-Jan-10 | 0.0 | 1.1 |  |  |  |  | 18.7 | 17.7 | 19.3 | 16.4 |
| 16-Jan-10 | 0.0 | 7.4 |  |  |  |  | 18.7 | 17.4 | 18.5 | 16.5 |
| 17-Jan-10 | 0.0 | 1.1 |  |  |  |  |  |  |  |  |
| 18-Jan-10 | 0.0 | 0.5 |  |  |  |  |  |  |  |  |
| 19-Jan-10 | 0.0 | 0.6 |  |  |  |  | 15.9 | 15.5 | 17.2 | 15.3 |
| 20-Jan-10 | 0.0 | 1.7 |  |  |  |  |  |  |  |  |
| 21-Jan-10 | 4.0 | 4.6 |  |  |  |  | 16.1 | 15.4 | 15.9 | 14.2 |
| 22-Jan-10 | 4.0 | 3.2 |  |  |  |  |  |  |  |  |
| 23-Jan-10 | 0.0 | 4.3 |  |  |  |  | 15.5 | 14.2 | 15.7 | 13.7 |
| 24-Jan-10 | 0.0 | 2.2 |  |  |  |  |  |  |  |  |
| 25-Jan-10 | 0.0 | 2.6 | 13.0 | 11.5 | 8.70 | 12.2 | 14.7 | 13.5 | 15.7 | 13.9 |
| 26-Jan-10 | 0.0 | 2.1 |  |  |  |  |  |  |  |  |
| 27-Jan-10 | 6.0 | 3.6 |  |  |  |  |  |  |  |  |
| 28-Jan-10 | 8.0 | 1.7 | 15.0 | 13.3 | 13.54 | 14.1 | 16.8 | 14.5 | 16.2 | 15.0 |
| 29-Jan-10 | 0.0 | 1.4 |  |  |  |  |  |  |  |  |
| 30-Jan-10 | 5.0 | 6.1 | 15.4 | 13.8 | 14.83 | 15.5 | 16.6 | 14.8 | 15.9 | 15.1 |
| 31-Jan-10 | 0.0 | 1.4 | 15.0 | 12.9 | 13.90 | 14.3 |  |  |  |  |
| 1-Feb-10 | 2.0 | 2.4 |  |  |  |  |  |  |  |  |
| 2-Feb-10 | 0.0 | 6.3 |  |  |  |  | 16.9 | 15.1 | 16.3 | 15.1 |
| 3-Feb-10 | 0.0 | 3.4 |  |  |  |  |  |  |  |  |
| 4-Feb-10 | 0.0 | 5.5 | 14.7 | 12.9 | 12.74 | 14.0 | 17.3 | 15.7 | 16.4 | 14.9 |
| 5-Feb-10 | 0.0 | 2.8 |  |  |  |  |  |  |  |  |
| 6-Feb-10 | 0.0 | 6.9 | 13.5 | 11.8 | 11.96 | 13.4 | 14.8 | 14.5 | 15.9 | 14.0 |
| 7-Feb-10 | 0.0 | 3.5 |  |  |  |  |  |  |  |  |
| 8-Feb-10 | 0.0 | 6.2 |  |  |  |  |  |  |  |  |
| 9-Feb-10 | 0.0 | 2.4 | 12.1 | 10.3 | 10.20 | 11.7 | 12.7 | 12.2 | 14.3 | 12.7 |
| 10-Feb-10 | 0.0 | 1.4 |  |  |  |  |  |  |  |  |
| 11-Feb-10 | 5.0 | 5.3 | 12.3 | 10.3 | 9.96 | 11.6 | 14.4 | 13.4 | 15.6 | 13.4 |
| 12-Feb-10 | 0.0 | 3.0 |  |  |  |  |  |  |  |  |
| 13-Feb-10 | 0.0 | 1.9 | 12.2 | 10.1 | 8.90 | 11.5 | 13.6 | 13.4 | 14.2 | 12.2 |
| 14-Feb-10 | 0.0 | 4.7 |  |  |  |  |  |  |  |  |
| 15-Feb-10 | 0.0 | 3.4 | 11.1 | 9.6 | 9.11 | 10.6 | 12.4 | 12.9 | 13.6 | 11.5 |
| 16-Feb-10 | 0.0 | 4.0 |  |  |  |  |  |  |  |  |
| 17-Feb-10 | 0.0 | 1.2 |  |  |  |  |  |  |  |  |
| 18-Feb-10 | 0.0 | 0.4 |  |  |  |  |  |  |  |  |
| 19-Feb-10 | 20.0 | 9.7 |  |  |  |  |  |  |  |  |
| 20-Feb-10 | 12.0 | 10.5 | 16.8 | 16.8 | 16.09 | 17.6 | 17.3 | 15.6 | 18.3 | 15.8 |
| 21-Feb-10 | 6.0 | 13.0 |  |  |  |  |  |  |  |  |
| 22-Feb-10 | 2.0 | 3.0 | 17.1 | 16.9 | 16.68 | 17.7 | 19.1 | 18.4 | 19.8 | 18.4 |
| 23-Feb-10 | 0.0 | 7.3 |  |  |  |  |  |  |  |  |
| 24-Feb-10 | 2.0 | 4.3 |  |  |  |  |  |  |  |  |
| 25-Feb-10 | 4.0 | 12.1 | 18.0 | 17.7 | 17.56 | 18.3 |  |  |  |  |
| 26-Feb-10 | 0.0 | 12.3 |  |  |  |  | 20.5 | 19.9 | 20.8 | 20.4 |
| 27-Feb-10 | 10.0 | 1.6 |  |  |  |  |  |  |  |  |
| 28-Feb-10 | 3.0 | 2.0 |  |  |  |  |  |  |  |  |
| 1-Mar-10 | 3.0 | 1.5 |  |  |  |  |  |  |  |  |
| 2-Mar-10 | 0.0 | 1.1 |  |  |  |  |  |  |  |  |
| 3-Mar-10 | 32.0 | 7.1 |  |  |  |  |  |  |  |  |
| 4-Mar-10 | 16.0 | 6.6 | 19.3 | 20.4 | 19.81 | 20.2 |  |  |  |  |
| 5-Mar-10 | 6.0 | 5.8 |  |  |  |  |  |  |  |  |
| 6-Mar-10 | 0.0 | -0.9 |  |  |  |  |  |  |  |  |
| 7-Mar-10 | 0.0 | 6.4 |  |  |  |  |  |  |  |  |
| 8-Mar-10 | 0.0 | 10.9 |  |  |  |  |  |  |  |  |
| 9-Mar-10 | 3.0 | 0.7 |  |  |  |  |  |  |  |  |
| 10-Mar-10 | 0.0 | 3.9 |  |  |  |  |  |  |  |  |
| 11-Mar-10 | 0.0 | 6.0 |  |  |  |  |  |  |  |  |
| 12-Mar-10 | 0.0 | 3.8 |  |  |  |  |  |  |  |  |
| 13-Mar-10 | 0.0 | 1.6 |  |  |  |  |  |  |  |  |
| 14-Mar-10 | 6.0 | 1.8 |  |  |  |  |  |  |  |  |
| 15-Mar-10 | 0.0 | 7.4 |  |  |  |  |  |  |  |  |
| 16-Mar-10 | 0.0 | 0.5 | 16.4 | 16.9 | 14.80 | 17.9 |  |  |  |  |
| 17-Mar-10 | 0.0 | 3.3 |  |  |  |  |  |  |  |  |
| 18-Mar-10 | 0.0 | 3.5 | 14.8 | 14.9 | 13.76 | 15.1 | 21.5 | 20.5 | 20.3 | 22.1 |
| 19-Mar-10 | 0.0 | 0.2 |  |  |  |  | 19.2 | 18.6 | 19.2 | 19.0 |
| 20-Mar-10 | 0.0 | 4.7 | 14.4 | 14.6 | 13.85 | 15.1 | 18.5 | 19.0 | 19.5 | 18.9 |
| 21-Mar-10 | 0.0 | 1.5 |  |  |  |  | 14.3 | 14.4 | 15.4 | 16.0 |
| 22-Mar-10 | 0.0 | 1.2 |  |  |  |  |  |  |  |  |
| 23-Mar-10 | 0.0 | 1.7 |  |  |  |  |  |  |  |  |
| 24-Mar-10 | 0.0 | 3.6 |  |  |  |  |  |  |  |  |
| 25-Mar-10 | 0.0 | 5.5 |  |  |  |  |  |  |  |  |
| 26-Mar-10 | 6.0 | 6.4 |  |  |  |  |  |  |  |  |
| 27-Mar-10 | 0.0 | 1.2 |  |  |  |  |  |  |  |  |
| 28-Mar-10 | 0.0 | 2.5 |  |  |  |  |  |  |  |  |
| 29-Mar-10 | 0.0 | 7.6 |  |  |  |  |  |  |  |  |
| 30-Mar-10 | 0.0 | 4.9 |  |  |  |  |  |  |  |  |
| 31-Mar-10 | 0.0 | 7.2 |  |  |  |  |  |  |  |  |
| 1-Apr-10 | 0.0 | 4.3 |  |  |  |  |  |  |  |  |
| 2-Apr-10 | 0.0 | 3.4 | 11.9 | 12.8 | 11.55 | 13.2 |  |  |  |  |
| 3-Apr-10 | 0.0 | 8.2 |  |  |  |  |  |  |  |  |
| 4-Apr-10 | 0.0 | 4.4 |  |  |  |  |  |  |  |  |
| 5-Apr-10 | 0.0 | 7.5 |  |  |  |  |  |  |  |  |
| 6-Apr-10 | 10.0 | 3.3 |  |  |  |  |  |  |  |  |
| 7-Apr-10 | 26.0 | 4.6 |  |  |  |  |  |  |  |  |
| 8-Apr-10 | 0.0 | 4.1 |  |  |  |  |  |  |  |  |
| 9-Apr-10 | 32.0 | 4.1 | 13.5 | 12.2 | 9.35 | 13.1 |  |  |  |  |
| 10-Apr-10 | 20.0 | 4.2 |  |  |  |  | 11.6 | 13.2 | 13.6 | 12.3 |
| 11-Apr-10 | 0.0 | 2.5 |  |  |  |  |  |  |  |  |
| 12-Apr-10 | 0.0 | 8.8 |  |  |  |  |  |  |  |  |
| 13-Apr-10 | 0.0 | 1.6 |  |  |  |  |  |  |  |  |
| 14-Apr-10 | 0.0 | 3.2 |  |  |  |  |  |  |  |  |
| 15-Apr-10 | 0.0 | 5.8 |  |  |  |  |  |  |  |  |
| 16-Apr-10 | 0.0 | 8.1 |  |  |  |  |  |  |  |  |
| 17-Apr-10 | 0.0 | 3.4 |  |  |  |  |  |  |  |  |
| 18-Apr-10 | 0.0 | 2.3 |  |  |  |  |  |  |  |  |
| 19-Apr-10 | 0.0 | 2.3 |  |  |  |  |  |  |  |  |
| 20-Apr-10 | 0.0 | 2.7 |  |  |  |  |  |  |  |  |
| 21-Apr-10 | 0.0 | 2.2 |  |  |  |  |  |  |  |  |
| 22-Apr-10 | 0.0 | 4.6 |  |  |  |  |  |  |  |  |
| 23-Apr-10 | 10.0 | 4.5 |  |  |  |  |  |  |  |  |
| 24-Apr-10 | 0.0 | 4.0 |  |  |  |  |  |  |  |  |
| 25-Apr-10 | 0.0 | 3.9 |  |  |  |  |  |  |  |  |
| 26-Apr-10 | 6.0 | 5.7 |  |  |  |  |  |  |  |  |
| 27-Apr-10 | 0.0 | 5.5 |  |  |  |  |  |  |  |  |
| 28-Apr-10 | 0.0 | 4.7 |  |  |  |  |  |  |  |  |
| 29-Apr-10 | 0.0 | 6.2 |  |  |  |  |  |  |  |  |
| 30-Apr-10 | 0.0 | 0.6 |  |  |  |  |  |  |  |  |
| 1-May-10 | 0.0 | 5.3 |  |  |  |  |  |  |  |  |
| 2-May-10 | 0.0 | 5.6 |  |  |  |  |  |  |  |  |
| 3-May-10 | 0.0 | 6.1 |  |  |  |  |  |  |  |  |
| 4-May-10 | 0.0 | 3.1 |  |  |  |  |  |  |  |  |
| 5-May-10 | 0.0 | 8.2 |  |  |  |  |  |  |  |  |
| 6-May-10 | 0.0 | 4.2 |  |  |  |  |  |  |  |  |
| 7-May-10 | 0.0 | 5.2 | 9.5 | 10.2 | 9.22 | 10.5 | 11.3 | 9.7 | 10.4 | 10.4 |
| 8-May-10 | 0.0 | 4.7 |  |  |  |  |  |  |  |  |
| 9-May-10 | 0.0 | 4.6 |  |  |  |  |  |  |  |  |
| 10-May-10 | 0.0 | 4.2 |  |  |  |  |  |  |  |  |
| 11-May-10 | 0.0 | 3.7 |  |  |  |  |  |  |  |  |
| 12-May-10 | 0.0 | 11.2 |  |  |  |  |  |  |  |  |
| 13-May-10 | 0.0 | 0.8 |  |  |  |  |  |  |  |  |
| 14-May-10 | 0.0 | 3.8 | 9.6 | 7.8 | 8.02 | 9.9 | 8.7 | 6.9 | 7.7 | 7.0 |
| 15-May-10 | 0.0 | 5.6 |  |  |  |  |  |  |  |  |
| 16-May-10 | 0.0 | 3.2 |  |  |  |  |  |  |  |  |
| 17-May-10 | 0.0 | 8.9 |  |  |  |  |  |  |  |  |
| 18-May-10 | 0.0 | 3.2 |  |  |  |  |  |  |  |  |
| 19-May-10 | 0.0 | 5.1 |  |  |  |  |  |  |  |  |
| 20-May-10 | 0.0 | 7.3 | 10.8 | 8.5 | 9.15 | 9.9 | 10.5 | 8.7 | 9.1 | 9.4 |
| 21-May-10 | 0.0 | 8.4 |  |  |  |  |  |  |  |  |
| 22-May-10 | 0.0 | 4.6 |  |  |  |  |  |  |  |  |
| 23-May-10 | 44.0 | 3.8 |  |  |  |  |  |  |  |  |
| 24-May-10 | 0.0 | 1.7 |  |  |  |  |  |  |  |  |
| 25-May-10 | 0.0 | 6.6 |  |  |  |  |  |  |  |  |
| 26-May-10 | 0.0 | 2.5 |  |  |  |  |  |  |  |  |
| 27-May-10 | 0.0 | 3.9 |  |  |  |  |  |  |  |  |
| 28-May-10 | 0.0 | 2.4 |  |  |  |  |  |  |  |  |
| 29-May-10 | 0.0 | 2.5 |  |  |  |  |  |  |  |  |
| 30-May-10 | 0.0 | 5.1 |  |  |  |  |  |  |  |  |
| 31-May-10 | 10.0 | 4.3 | 15.4 | 13.7 | 14.88 | 15.1 |  |  |  |  |
| 1-Jun-10 | 0.0 | 7.6 |  |  |  |  |  |  |  |  |
| 2-Jun-10 | 0.0 | 3.2 |  |  |  |  |  |  |  |  |
| 3-Jun-10 | 0.0 | 6.0 | 16.1 | 14.3 | 14.47 | 13.9 | 18.5 | 16.4 | 15.9 | 18.1 |
| 4-Jun-10 | 0.0 | 9.0 | 14.8 | 14.4 | 14.47 | 14.1 |  |  |  |  |
| 5-Jun-10 | 0.0 | 4.3 |  |  |  |  | 18.1 | 16.7 | 16.2 | 18.0 |
| 6-Jun-10 | 0.0 | 8.0 |  |  |  |  |  |  |  |  |
| 7-Jun-10 | 0.0 | 5.9 | 13.6 | 13.3 | 13.42 | 11.7 | 16.8 | 15.4 | 14.7 | 16.7 |
| 8-Jun-10 | 0.0 | 5.7 |  |  |  |  |  |  |  |  |
| 9-Jun-10 | 0.0 | -2.0 |  |  |  |  |  |  |  |  |
| 10-Jun-10 | 0.0 | 5.3 |  |  |  |  |  |  |  |  |
| 11-Jun-10 | 0.0 | 3.4 |  |  |  |  |  |  |  |  |
| 12-Jun-10 | 0.0 | 1.0 |  |  |  |  |  |  |  |  |
| 13-Jun-10 | 0.0 | 0.3 |  |  |  |  |  |  |  |  |
| 14-Jun-10 | 0.0 | 9.6 |  |  |  |  |  |  |  |  |
| 15-Jun-10 | 0.0 | 1.1 |  |  |  |  |  |  |  |  |
| 16-Jun-10 | 0.0 | 7.4 |  |  |  |  |  |  |  |  |
| 17-Jun-10 | 0.0 | 1.1 |  |  |  |  |  |  |  |  |
| 18-Jun-10 | 0.0 | 0.5 |  |  |  |  |  |  |  |  |
| 19-Jun-10 | 0.0 | 0.6 |  |  |  |  |  |  |  |  |
| 20-Jun-10 | 0.0 | 1.7 |  |  |  |  |  |  |  |  |
| 21-Jun-10 | 0.0 | 4.6 | 12.2 | 9.9 | 10.20 | 12.5 | 13.3 | 12.6 | 12.4 | 14.1 |
| 22-Jun-10 | 0.0 | 3.2 |  |  |  |  |  |  |  |  |
| 23-Jun-10 | 0.0 | 4.3 |  |  |  |  | 17.1 | 14.8 | 14.6 | 16.1 |
| 24-Jun-10 | 0.0 | 2.2 |  |  |  |  |  |  |  |  |
| 25-Jun-10 | 0.0 | 2.6 | 11.6 | 10.2 | 11.12 | 11.4 | 13.5 | 13.2 | 12.7 | 13.5 |
| 26-Jun-10 | 0.0 | 2.1 | 12.4 | 10.7 | 11.63 | 11.5 | 13.8 | 13.2 | 12.6 | 13.8 |
| 27-Jun-10 | 0.0 | 3.6 |  |  |  |  |  |  |  |  |
| 28-Jun-10 | 0.0 | 1.7 |  |  |  |  |  |  |  |  |
| 29-Jun-10 | 0.0 | 1.4 |  |  |  |  |  |  |  |  |
| 30-Jun-10 | 0.0 | 6.1 |  |  |  |  |  |  |  |  |
| 1-Jul-10 | 0.0 | 1.4 |  |  |  |  |  |  |  |  |
| 2-Jul-10 | 0.0 | 2.4 | 12.2 | 10.1 | 10.62 | 9.6 | 12.2 | 11.6 | 12.2 | 12.1 |
| 3-Jul-10 | 0.0 | 6.3 | 10.8 | 11.3 | 10.48 | 11.2 | 13.8 | 13.4 | 12.9 | 14.4 |
| 4-Jul-10 | 0.0 | 3.4 |  |  |  |  |  |  |  |  |
| 5-Jul-10 | 0.0 | 5.5 |  |  |  |  |  |  |  |  |
| 6-Jul-10 | 0.0 | 2.8 |  |  |  |  |  |  |  |  |
| 7-Jul-10 | 0.0 | 6.9 |  |  |  |  |  |  |  |  |
| 8-Jul-10 | 0.0 | 3.5 |  |  |  |  |  |  |  |  |
| 9-Jul-10 | 0.0 | 6.2 |  |  |  |  |  |  |  |  |
| 10-Jul-10 | 0.0 | 2.4 |  |  |  |  |  |  |  |  |
| 11-Jul-10 | 0.0 | 1.4 | 11.1 | 10.9 | 9.73 | 10.8 |  |  |  |  |
| 12-Jul-10 | 0.0 | 5.3 |  |  |  |  |  |  |  |  |
| 13-Jul-10 | 0.0 | 3.0 |  |  |  |  |  |  |  |  |
| 14-Jul-10 | 0.0 | 1.9 |  |  |  |  |  |  |  |  |
| 15-Jul-10 | 0.0 | 4.7 |  |  |  |  | 12.5 | 12.0 | 11.6 | 12.2 |
| 16-Jul-10 | 0.0 | 3.4 | 10.6 | 10.1 | 10.29 | 10.8 | 12.4 | 12.8 | 12.4 | 13.0 |
| 17-Jul-10 | 0.0 | 4.0 |  |  |  |  |  |  |  |  |
| 18-Jul-10 | 0.0 | 1.2 |  |  |  |  |  |  |  |  |
| 19-Jul-10 | 0.0 | 0.4 |  |  |  |  |  |  |  |  |
| 20-Jul-10 | 0.0 | 9.7 |  |  |  |  |  |  |  |  |
| 21-Jul-10 | 0.0 | 10.5 |  |  |  |  | 12.5 | 12.6 | 11.9 | 12.8 |
| 22-Jul-10 | 0.0 | 13.0 |  |  |  |  | 12.6 | 13.1 | 12.8 | 13.1 |
| 23-Jul-10 | 0.0 | 3.0 |  |  |  |  |  |  |  |  |
| 24-Jul-10 | 0.0 | 7.3 | 11.4 | 9.7 | 9.94 | 10.8 | 12.6 | 12.8 | 12.5 | 13.1 |
| 25-Jul-10 | 0.0 | 4.3 | 11.4 | 8.9 | 10.27 | 11.2 |  |  |  |  |
| 26-Jul-10 | 0.0 | 12.1 | 11.8 | 11.1 | 9.37 | 11.3 |  |  |  |  |
| 27-Jul-10 | 0.0 | 12.3 |  |  |  |  |  |  |  |  |
| 28-Jul-10 | 0.0 | 1.6 |  |  |  |  |  |  |  |  |
| 29-Jul-10 | 0.0 | 2.0 |  |  |  |  |  |  |  |  |
| 30-Jul-10 | 0.0 | 1.5 |  |  |  |  |  |  |  |  |
| 31-Jul-10 | 0.0 | 1.1 |  |  |  |  |  |  |  |  |
| 1-Aug-10 | 0.0 | 7.1 | 11.7 | 9.0 | 9.46 | 10.8 | 11.7 | 12.0 | 11.9 | 12.1 |
| 2-Aug-10 | 0.0 | 6.6 |  |  |  |  |  |  |  |  |
| 3-Aug-10 | 0.0 | 5.8 | 10.8 | 11.5 | 11.48 | 10.5 |  |  |  |  |
| 4-Aug-10 | 0.0 | -0.9 |  |  |  |  |  |  |  |  |
| 5-Aug-10 | 0.0 | 6.4 |  |  |  |  |  |  |  |  |
| 6-Aug-10 | 0.0 | 10.9 |  |  |  |  | 11.8 | 11.8 | 12.0 | 12.0 |
| 7-Aug-10 | 0.0 | 0.7 | 12.5 | 8.5 | 10.02 | 10.8 | 12.5 | 12.4 | 12.6 | 12.7 |
| 8-Aug-10 | 0.0 | 3.9 |  |  |  |  |  |  |  |  |
| 9-Aug-10 | 0.0 | 6.0 |  |  |  |  |  |  |  |  |
| 10-Aug-10 | 0.0 | 3.8 |  |  |  |  |  |  |  |  |
| 11-Aug-10 | 0.0 | 1.6 |  |  |  |  |  |  |  |  |
| 12-Aug-10 | 0.0 | 1.8 | 11.1 | 9.2 | 8.85 | 10.2 | 10.5 | 10.5 | 12.1 | 10.9 |
| 13-Aug-10 | 0.0 | 7.4 | 11.6 | 9.5 | 9.30 | 10.7 | 12.2 | 12.4 | 12.7 | 12.3 |
| 14-Aug-10 | 0.0 | 0.5 |  |  |  |  |  |  |  |  |
| 15-Aug-10 | 0.0 | 3.3 |  |  |  |  |  |  |  |  |
| 16-Aug-10 | 0.0 | 3.5 |  |  |  |  |  |  |  |  |
| 17-Aug-10 | 0.0 | 0.2 |  |  |  |  |  |  |  |  |
| 18-Aug-10 | 0.0 | 4.7 |  |  |  |  |  |  |  |  |
| 19-Aug-10 | 0.0 | 1.5 |  |  |  |  |  |  |  |  |
| 20-Aug-10 | 0.0 | 1.2 |  |  |  |  |  |  |  |  |
| 21-Aug-10 | 0.0 | 1.7 |  |  |  |  |  |  |  |  |
| 22-Aug-10 | 0.0 | 3.6 |  |  |  |  |  |  |  |  |
| 23-Aug-10 | 0.0 | 5.5 |  |  |  |  |  |  |  |  |
| 24-Aug-10 | 0.0 | 6.4 |  |  |  |  |  |  |  |  |
| 25-Aug-10 | 0.0 | 1.2 |  |  |  |  | 11.6 | 12.1 | 12.0 | 11.6 |
| 26-Aug-10 | 0.0 | 2.5 | 10.4 | 10.4 | 8.74 | 10.3 |  |  |  |  |
| 27-Aug-10 | 0.0 | 7.6 | 12.7 | 10.7 | 9.34 | 9.6 |  |  |  |  |
| 28-Aug-10 | 0.0 | 4.9 |  |  |  |  |  |  |  |  |
| 29-Aug-10 | 0.0 | 7.2 |  |  |  |  |  |  |  |  |
| 30-Aug-10 | 0.0 | 4.3 |  |  |  |  |  |  |  |  |
| 31-Aug-10 | 0.0 | 3.4 |  |  |  |  |  |  |  |  |
| 1-Sep-10 | 0.0 | 8.2 |  |  |  |  |  |  |  |  |
| 2-Sep-10 | 0.0 | 4.4 | 12.4 | 9.6 | 9.94 | 8.9 |  |  |  |  |
| 3-Sep-10 | 0.0 | 7.5 | 10.9 | 7.9 | 7.62 | 10.0 | 11.1 | 11.3 | 11.9 | 10.8 |
| 4-Sep-10 | 0.0 | 3.3 |  |  |  |  |  |  |  |  |
| 5-Sep-10 | 0.0 | 4.6 |  |  |  |  |  |  |  |  |
| 6-Sep-10 | 0.0 | 4.1 |  |  |  |  |  |  |  |  |
| 7-Sep-10 | 0.0 | 4.1 | 11.6 | 8.3 | 7.84 | 10.1 | 10.8 | 11.2 | 11.8 | 10.7 |
| 8-Sep-10 | 0.0 | 4.2 |  |  |  |  |  |  |  |  |
| 9-Sep-10 | 0.0 | 2.5 | 10.9 | 7.8 | 7.59 | 9.8 | 10.5 | 11.3 | 11.6 | 10.3 |
| 10-Sep-10 | 0.0 | 8.8 | 10.9 | 9.8 | 7.88 | 10.0 | 10.5 | 11.3 | 11.6 | 10.3 |
| 11-Sep-10 | 0.0 | 1.6 |  |  |  |  |  |  |  |  |
| 12-Sep-10 | 0.0 | 3.2 |  |  |  |  |  |  |  |  |
| 13-Sep-10 | 0.0 | 5.8 |  |  |  |  |  |  |  |  |
| 14-Sep-10 | 0.0 | 8.1 |  |  |  |  |  |  |  |  |
| 15-Sep-10 | 0.0 | 3.4 |  |  |  |  |  |  |  |  |
| 16-Sep-10 | 0.0 | 2.3 |  |  |  |  |  |  |  |  |
| 17-Sep-10 | 0.0 | 2.3 |  |  |  |  |  |  |  |  |
| 18-Sep-10 | 0.0 | 2.7 |  |  |  |  |  |  |  |  |
| 19-Sep-10 | 0.0 | 2.2 |  |  |  |  |  |  |  |  |
| 20-Sep-10 | 0.0 | 4.6 |  |  |  |  |  |  |  |  |
| 21-Sep-10 | 0.0 | 4.5 |  |  |  |  |  |  |  |  |
| 22-Sep-10 | 0.0 | 4.0 |  |  |  |  |  |  |  |  |
| 23-Sep-10 | 0.0 | 3.9 |  |  |  |  |  |  |  |  |
| 24-Sep-10 | 0.0 | 5.7 |  |  |  |  |  |  |  |  |
| 25-Sep-10 | 0.0 | 5.5 |  |  |  |  |  |  |  |  |
| 26-Sep-10 | 0.0 | 4.7 |  |  |  |  |  |  |  |  |
| 27-Sep-10 | 0.0 | 6.2 |  |  |  |  |  |  |  |  |
| 28-Sep-10 | 0.0 | 0.6 |  |  |  |  |  |  |  |  |
| 29-Sep-10 | 0.0 | 5.3 |  |  |  |  |  |  |  |  |
| 30-Sep-10 | 0.0 | 5.6 |  |  |  |  |  |  |  |  |
| 1-Oct-10 | 0.0 | 6.1 |  |  |  |  |  |  |  |  |
| 2-Oct-10 | 0.0 | 3.1 |  |  |  |  |  |  |  |  |
| 3-Oct-10 | 0.0 | 8.2 |  |  |  |  |  |  |  |  |
| 4-Oct-10 | 0.0 | 4.2 |  |  |  |  |  |  |  |  |
| 5-Oct-10 | 0.0 | 5.2 |  |  |  |  |  |  |  |  |
| 6-Oct-10 | 0.0 | 4.7 |  |  |  |  |  |  |  |  |
| 7-Oct-10 | 0.0 | 4.6 |  |  |  |  |  |  |  |  |
| 8-Oct-10 | 0.0 | 4.2 |  |  |  |  |  |  |  |  |
| 9-Oct-10 | 0.0 | 3.7 |  |  |  |  |  |  |  |  |
| 10-Oct-10 | 0.0 | 11.2 |  |  |  |  |  |  |  |  |
| 11-Oct-10 | 0.0 | 0.8 |  |  |  |  |  |  |  |  |
| 12-Oct-10 | 0.0 | 3.8 |  |  |  |  |  |  |  |  |
| 13-Oct-10 | 0.0 | 5.6 |  |  |  |  |  |  |  |  |
| 14-Oct-10 | 0.0 | 3.2 |  |  |  |  |  |  |  |  |
| 15-Oct-10 | 0.0 | 8.9 |  |  |  |  |  |  |  |  |
| 16-Oct-10 | 0.0 | 3.2 |  |  |  |  |  |  |  |  |
| 17-Oct-10 | 0.0 | 5.1 |  |  |  |  |  |  |  |  |
| 18-Oct-10 | 0.0 | 7.3 |  |  |  |  |  |  |  |  |
| 19-Oct-10 | 0.0 | 8.4 |  |  |  |  |  |  |  |  |
| 20-Oct-10 | 0.0 | 4.6 |  |  |  |  |  |  |  |  |
| 21-Oct-10 | 0.0 | 3.8 |  |  |  |  |  |  |  |  |
| 22-Oct-10 | 0.0 | 1.7 |  |  |  |  |  |  |  |  |
| 23-Oct-10 | 0.0 | 6.6 |  |  |  |  |  |  |  |  |
| 24-Oct-10 | 0.0 | 2.5 |  |  |  |  |  |  |  |  |
| 25-Oct-10 | 0.0 | 3.9 |  |  |  |  |  |  |  |  |
| 26-Oct-10 | 0.0 | 2.4 |  |  |  |  |  |  |  |  |
| 27-Oct-10 | 0.0 | 2.5 |  |  |  |  |  |  |  |  |
| 28-Oct-10 | 0.0 | 5.1 |  |  |  |  |  |  |  |  |
| 29-Oct-10 | 0.0 | 4.3 |  |  |  |  |  |  |  |  |
| 30-Oct-10 | 0.0 | 7.6 |  |  |  |  |  |  |  |  |
| 31-Oct-10 | 0.0 | 3.2 |  |  |  |  |  |  |  |  |
| 1-Nov-10 | 0.0 | 6.0 |  |  |  |  |  |  |  |  |
| 2-Nov-10 | 4.0 | 9.0 |  |  |  |  |  |  |  |  |
| 3-Nov-10 | 5.0 | 4.3 |  |  |  |  |  |  |  |  |
| 4-Nov-10 | 0.0 | 8.0 |  |  |  |  | 6.2 | 5.9 | 4.8 | 4.9 |
| 5-Nov-10 | 0.0 | 5.9 |  |  |  |  | 7.0 | 5.3 | 6.0 | 5.3 |
| 6-Nov-10 | 5.0 | 5.7 |  |  |  |  |  |  |  |  |
| 7-Nov-10 | 0.0 | -2.0 |  |  |  |  |  |  |  |  |
| 8-Nov-10 | 0.0 | 5.3 |  |  |  |  |  |  |  |  |
| 9-Nov-10 | 0.0 | 3.4 |  |  |  |  | 5.7 | 5.3 | 5.4 | 5.6 |
| 10-Nov-10 | 1.0 | 1.0 |  |  |  |  |  |  |  |  |
| 11-Nov-10 | 1.0 | 0.3 |  |  |  |  |  |  |  |  |
| 12-Nov-10 | 0.0 | 9.6 |  |  |  |  |  |  |  |  |
| 13-Nov-10 | 1.0 | 1.1 | 14.2 | 10.7 | 11.53 | 13.6 | 7.0 | 5.6 | 5.5 | 5.8 |
| 14-Nov-10 | 0.0 | 7.4 |  |  |  |  |  |  |  |  |
| 15-Nov-10 | 75.0 | 1.1 |  |  |  |  |  |  |  |  |
| 16-Nov-10 | 0.0 | 0.5 |  |  |  |  |  |  |  |  |
| 17-Nov-10 | 0.0 | 0.6 |  |  |  |  |  |  |  |  |
| 18-Nov-10 | 0.0 | 1.7 | 14.2 | 11.0 | 11.48 | 13.8 | 12.0 | 10.9 | 5.6 | 9.2 |
| 19-Nov-10 | 3.0 | 4.6 |  |  |  |  |  |  |  |  |
| 20-Nov-10 | 0.0 | 3.2 |  |  |  |  | 10.7 | 10.7 | 12.7 | 8.9 |
| 21-Nov-10 | 0.0 | 4.3 |  |  |  |  |  |  |  |  |
| 22-Nov-10 | 0.0 | 2.2 |  |  |  |  |  |  |  |  |
| 23-Nov-10 | 0.0 | 2.6 |  |  |  |  |  |  |  |  |
| 24-Nov-10 | 0.0 | 2.1 |  |  |  |  |  |  |  |  |
| 25-Nov-10 | 0.0 | 3.6 |  |  |  |  |  |  |  |  |
| 26-Nov-10 | 0.0 | 1.7 | 14.4 | 10.8 | 10.44 | 11.0 | 12.1 | 13.2 | 14.1 | 11.8 |
| 27-Nov-10 | 0.0 | 1.4 |  |  |  |  |  |  |  |  |
| 28-Nov-10 | 4.0 | 6.1 |  |  |  |  |  |  |  |  |
| 29-Nov-10 | 0.0 | 1.4 | 18.2 | 15.2 | 15.73 | 14.5 |  |  |  |  |
| 30-Nov-10 | 5.0 | 2.4 |  |  |  |  | 15.9 | 15.1 | 16.4 | 15.3 |
| 1-Dec-10 | 0.0 | 6.3 |  |  |  |  |  |  |  |  |
| 2-Dec-10 | 0.0 | 3.4 | 18.5 | 15.7 | 15.11 | 15.0 |  |  |  |  |
| 3-Dec-10 | 0.0 | 5.5 | 19.1 | 16.0 | 16.12 | 16.8 | 20.3 | 19.3 | 19.4 | 18.8 |
| 4-Dec-10 | 0.0 | 2.8 |  |  |  |  |  |  |  |  |
| 5-Dec-10 | 10.0 | 6.9 |  |  |  |  |  |  |  |  |
| 6-Dec-10 | 28.0 | 3.5 |  |  |  |  |  |  |  |  |
| 7-Dec-10 | 3.0 | 6.2 |  |  |  |  |  |  |  |  |
| 8-Dec-10 | 0.0 | 2.4 |  |  |  |  |  |  |  |  |
| 9-Dec-10 | 0.0 | 1.4 |  |  |  |  |  |  |  |  |
| 10-Dec-10 | 0.0 | 5.3 |  |  |  |  |  |  |  |  |
| 11-Dec-10 | 0.0 | 3.0 |  |  |  |  |  |  |  |  |
| 12-Dec-10 | 0.0 | 1.9 | 19.3 | 13.9 | 13.97 | 14.0 | 22.6 | 21.2 | 20.4 | 19.7 |
| 13-Dec-10 | 0.0 | 4.7 |  |  |  |  |  |  |  |  |
| 14-Dec-10 | 20.0 | 3.4 |  |  |  |  |  |  |  |  |
| 15-Dec-10 | 22.0 | 4.0 |  |  |  |  |  |  |  |  |
| 16-Dec-10 | 3.0 | 1.2 |  |  |  |  |  |  |  |  |
| 17-Dec-10 | 4.0 | 0.4 |  |  |  |  |  |  |  |  |
| 18-Dec-10 | 20.0 | 9.7 |  |  |  |  |  |  |  |  |
| 19-Dec-10 | 0.0 | 10.5 |  |  |  |  |  |  |  |  |
| 20-Dec-10 | 0.0 | 13.0 |  |  |  |  |  |  |  |  |
| 21-Dec-10 | 0.0 | 3.0 |  |  |  |  |  |  |  |  |
| 22-Dec-10 | 0.0 | 7.3 |  |  |  |  |  |  |  |  |
| 23-Dec-10 | 0.0 | 4.3 | 16.9 | 15.0 | 15.87 | 17.5 | 25.3 | 23.3 | 21.3 | 21.5 |
| 24-Dec-10 | 0.0 | 12.1 | 18.9 | 13.6 | 15.73 | 14.9 |  |  |  |  |
| 25-Dec-10 | 0.0 | 12.3 |  |  |  |  |  |  |  |  |
| 26-Dec-10 | 1.0 | 1.6 |  |  |  |  |  |  |  |  |
| 27-Dec-10 | 0.0 | 2.0 |  |  |  |  |  |  |  |  |
| 28-Dec-10 | 0.0 | 1.5 |  |  |  |  |  |  |  |  |
| 29-Dec-10 | 0.0 | 1.1 |  |  |  |  |  |  |  |  |
| 30-Dec-10 | 0.0 | 7.1 |  |  |  |  |  |  |  |  |
| 31-Dec-10 | 0.0 | 6.6 |  |  |  |  |  |  |  |  |
| 1-Jan-11 | 10.0 | 5.8 |  |  |  |  |  |  |  |  |
| 2-Jan-11 | 24.0 | -0.9 |  |  |  |  |  |  |  |  |
| 3-Jan-11 | 0.0 | 6.4 |  |  |  |  |  |  |  |  |
| 4-Jan-11 | 0.0 | 10.9 |  |  |  |  |  |  |  |  |
| 5-Jan-11 | 0.0 | 0.7 |  |  |  |  |  |  |  |  |
| 6-Jan-11 | 0.0 | 3.9 |  |  |  |  |  |  |  |  |
| 7-Jan-11 | 12.0 | 6.0 |  |  |  |  |  |  |  |  |
| 8-Jan-11 | 8.0 | 3.8 | 20.6 | 18.0 | 19.54 | 17.9 | 21.8 | 21.4 | 15.9 | 19.7 |
| 9-Jan-11 | 0.0 | 1.6 |  |  |  |  |  |  |  |  |
| 10-Jan-11 | 4.0 | 1.8 |  |  |  |  | 23.4 | 23.4 | 15.8 | 22.2 |
| 11-Jan-11 | 0.0 | 7.4 |  |  |  |  |  |  |  |  |
| 12-Jan-11 | 4.0 | 0.5 |  |  |  |  |  |  |  |  |
| 13-Jan-11 | 3.0 | 3.3 |  |  |  |  |  |  |  |  |
| 14-Jan-11 | 8.0 | 3.5 |  |  |  |  |  |  |  |  |
| 15-Jan-11 | 0.0 | 0.2 |  |  |  |  |  |  |  |  |
| 16-Jan-11 | 5.0 | 4.7 |  |  |  |  |  |  |  |  |
| 17-Jan-11 | 38.0 | 1.5 |  |  |  |  |  |  |  |  |
| 18-Jan-11 | 15.0 | 1.2 |  |  |  |  |  |  |  |  |
| 19-Jan-11 | 0.0 | 1.7 |  |  |  |  |  |  |  |  |
| 20-Jan-11 | 20.0 | 3.6 |  |  |  |  |  |  |  |  |
| 21-Jan-11 | 0.0 | 5.5 |  |  |  |  |  |  |  |  |
| 22-Jan-11 | 2.0 | 6.4 |  |  |  |  |  |  |  |  |
| 23-Jan-11 | 2.0 | 1.2 |  |  |  |  |  |  |  |  |
| 24-Jan-11 | 32.0 | 2.5 |  |  |  |  |  |  |  |  |
| 25-Jan-11 | 0.0 | 7.6 |  |  |  |  |  |  |  |  |
| 26-Jan-11 | 0.0 | 4.9 |  |  |  |  |  |  |  |  |
| 27-Jan-11 | 0.0 | 7.2 | 19.0 | 16.0 | 16.78 | 16.3 |  |  |  |  |
| 28-Jan-11 | 0.0 | 4.3 |  |  |  |  |  |  |  |  |
| 29-Jan-11 | 5.0 | 3.4 |  |  |  |  |  |  |  |  |
| 30-Jan-11 | 3.0 | 8.2 |  |  |  |  |  |  |  |  |
| 31-Jan-11 | 1.0 | 4.4 |  |  |  |  |  |  |  |  |
| 1-Feb-11 | 0.0 | 7.5 |  |  |  |  |  |  |  |  |
| 2-Feb-11 | 2.0 | 3.3 |  |  |  |  |  |  |  |  |
| 3-Feb-11 | 3.0 | 4.6 |  |  |  |  |  |  |  |  |
| 4-Feb-11 | 0.0 | 4.1 |  |  |  |  |  |  |  |  |
| 5-Feb-11 | 0.0 | 4.1 |  |  |  |  |  |  |  |  |
| 6-Feb-11 | 0.0 | 4.2 |  |  |  |  |  |  |  |  |
| 7-Feb-11 | 0.0 | 2.5 |  |  |  |  |  |  |  |  |
| 8-Feb-11 | 0.0 | 8.8 |  |  |  |  |  |  |  |  |
| 9-Feb-11 | 0.0 | 1.6 |  |  |  |  |  |  |  |  |
| 10-Feb-11 | 0.0 | 3.2 |  |  |  |  |  |  |  |  |
| 11-Feb-11 | 0.0 | 5.8 |  |  |  |  |  |  |  |  |
| 12-Feb-11 | 0.0 | 8.1 |  |  |  |  |  |  |  |  |
| 13-Feb-11 | 0.0 | 3.4 |  |  |  |  |  |  |  |  |
| 14-Feb-11 | 0.0 | 2.3 |  |  |  |  |  |  |  |  |
| 15-Feb-11 | 0.0 | 2.3 |  |  |  |  |  |  |  |  |
| 16-Feb-11 | 0.0 | 2.7 |  |  |  |  |  |  |  |  |
| 17-Feb-11 | 0.0 | 2.2 |  |  |  |  |  |  |  |  |
| 18-Feb-11 | 0.0 | 4.6 |  |  |  |  |  |  |  |  |
| 19-Feb-11 | 0.0 | 4.5 |  |  |  |  |  |  |  |  |
| 20-Feb-11 | 0.0 | 4.0 | 9.4 | 7.3 | 6.56 | 7.7 |  |  |  |  |
| 21-Feb-11 | 5.0 | 3.9 |  |  |  |  |  |  |  |  |
| 22-Feb-11 | 0.0 | 5.7 |  |  |  |  |  |  |  |  |
| 23-Feb-11 | 0.0 | 5.5 |  |  |  |  |  |  |  |  |
| 24-Feb-11 | 0.0 | 4.7 |  |  |  |  |  |  |  |  |
| 25-Feb-11 | 36.0 | 6.2 |  |  |  |  |  |  |  |  |
| 26-Feb-11 | 0.0 | 0.6 | 13.6 | 9.6 | 10.58 | 9.4 |  |  |  |  |
| 27-Feb-11 | 2.0 | 5.3 |  |  |  |  |  |  |  |  |
| 28-Feb-11 | 1.0 | 5.6 |  |  |  |  |  |  |  |  |
| 1-Mar-11 | 0.0 | 6.1 |  |  |  |  |  |  |  |  |
| 2-Mar-11 | 0.0 | 3.1 |  |  |  |  |  |  |  |  |
| 3-Mar-11 | 0.0 | 8.2 |  |  |  |  |  |  |  |  |
| 4-Mar-11 | 0.0 | 4.2 |  |  |  |  |  |  |  |  |
| 5-Mar-11 | 0.0 | 5.2 | 11.7 | 8.1 | 9.18 | 8.8 | 12.6 | 11.3 | 9.8 | 12.6 |
| 6-Mar-11 | 0.0 | 4.7 |  |  |  |  |  |  |  |  |
| 7-Mar-11 | 0.0 | 4.6 |  |  |  |  |  |  |  |  |
| 8-Mar-11 | 0.0 | 4.2 |  |  |  |  |  |  |  |  |
| 9-Mar-11 | 0.0 | 3.7 |  |  |  |  |  |  |  |  |
| 10-Mar-11 | 0.0 | 11.2 |  |  |  |  |  |  |  |  |
| 11-Mar-11 | 0.0 | 0.8 |  |  |  |  |  |  |  |  |
| 12-Mar-11 | 0.0 | 3.8 |  |  |  |  |  |  |  |  |
| 13-Mar-11 | 0.0 | 5.6 |  |  |  |  |  |  |  |  |
| 14-Mar-11 | 0.0 | 3.2 |  |  |  |  |  |  |  |  |
| 15-Mar-11 | 0.0 | 8.9 |  |  |  |  |  |  |  |  |
| 16-Mar-11 | 0.0 | 3.2 |  |  |  |  |  |  |  |  |
| 17-Mar-11 | 0.0 | 5.1 |  |  |  |  |  |  |  |  |
| 18-Mar-11 | 0.0 | 7.3 |  |  |  |  |  |  |  |  |
| 19-Mar-11 | 0.0 | 8.4 |  |  |  |  |  |  |  |  |
| 20-Mar-11 | 0.0 | 4.6 |  |  |  |  |  |  |  |  |
| 21-Mar-11 | 0.0 | 3.8 |  |  |  |  |  |  |  |  |
| 22-Mar-11 | 0.0 | 1.7 |  |  |  |  |  |  |  |  |
| 23-Mar-11 | 14.0 | 6.6 |  |  |  |  |  |  |  |  |
| 24-Mar-11 | 0.0 | 2.5 |  |  |  |  |  |  |  |  |
| 25-Mar-11 | 0.0 | 3.9 |  |  |  |  |  |  |  |  |
| 26-Mar-11 | 0.0 | 2.4 | 11.0 | 8.1 | 9.28 | 9.1 | 11.6 | 9.4 | 6.8 | 11.2 |
| 27-Mar-11 | 11.0 | 2.5 |  |  |  |  |  |  |  |  |
| 28-Mar-11 | 0.0 | 5.1 |  |  |  |  |  |  |  |  |
| 29-Mar-11 | 0.0 | 4.3 |  |  |  |  |  |  |  |  |
| 30-Mar-11 | 0.0 | 7.6 |  |  |  |  |  |  |  |  |
| 31-Mar-11 | 0.0 | 3.2 |  |  |  |  |  |  |  |  |
| 1-Apr-11 | 0.0 | 6.0 |  |  |  |  |  |  |  |  |
| 2-Apr-11 | 0.0 | 9.0 |  |  |  |  |  |  |  |  |
| 3-Apr-11 | 0.0 | 4.3 |  |  |  |  |  |  |  |  |
| 4-Apr-11 | 0.0 | 8.0 |  |  |  |  |  |  |  |  |
| 5-Apr-11 | 0.0 | 5.9 |  |  |  |  |  |  |  |  |
| 6-Apr-11 | 0.0 | 5.7 |  |  |  |  |  |  |  |  |
| 7-Apr-11 | 0.0 | -2.0 |  |  |  |  |  |  |  |  |
| 8-Apr-11 | 0.0 | 5.3 | 9.9 | 7.6 | 8.50 | 7.5 | 10.0 | 8.0 | 6.1 | 9.2 |
| 9-Apr-11 | 0.0 | 3.4 |  |  |  |  |  |  |  |  |
| 10-Apr-11 | 0.0 | 1.0 |  |  |  |  |  |  |  |  |
| 11-Apr-11 | 0.0 | 0.3 |  |  |  |  |  |  |  |  |
| 12-Apr-11 | 0.0 | 9.6 |  |  |  |  |  |  |  |  |
| 13-Apr-11 | 0.0 | 1.1 |  |  |  |  |  |  |  |  |
| 14-Apr-11 | 0.0 | 7.4 |  |  |  |  |  |  |  |  |
| 15-Apr-11 | 0.0 | 1.1 |  |  |  |  |  |  |  |  |
| 16-Apr-11 | 0.0 | 0.5 |  |  |  |  | 10.2 | 8.2 | 6.3 | 9.1 |
| 17-Apr-11 | 0.0 | 0.6 |  |  |  |  |  |  |  |  |
| 18-Apr-11 | 0.0 | 1.7 |  |  |  |  |  |  |  |  |
| 19-Apr-11 | 0.0 | 4.6 |  |  |  |  |  |  |  |  |
| 20-Apr-11 | 0.0 | 3.2 |  |  |  |  |  |  |  |  |
| 21-Apr-11 | 7.0 | 4.3 |  |  |  |  |  |  |  |  |
| 22-Apr-11 | 2.0 | 2.2 |  |  |  |  |  |  |  |  |
| 23-Apr-11 | 0.0 | 2.6 |  |  |  |  |  |  |  |  |
| 24-Apr-11 | 0.0 | 2.1 |  |  |  |  |  |  |  |  |
| 25-Apr-11 | 5.0 | 3.6 |  |  |  |  |  |  |  |  |
| 26-Apr-11 | 0.0 | 1.7 |  |  |  |  |  |  |  |  |
| 27-Apr-11 | 6.0 | 1.4 |  |  |  |  |  |  |  |  |
| 28-Apr-11 | 0.0 | 6.1 |  |  |  |  |  |  |  |  |
| 29-Apr-11 | 0.0 | 1.4 |  |  |  |  |  |  |  |  |
| 30-Apr-11 | 0.0 | 2.4 |  |  |  |  |  |  |  |  |
| 1-May-11 | 0.0 | 6.3 |  |  |  |  |  |  |  |  |
| 2-May-11 | 5.0 | 3.4 |  |  |  |  | 12.0 | 9.3 | 7.8 | 9.9 |
| 3-May-11 | 0.0 | 5.5 |  |  |  |  |  |  |  |  |
| 4-May-11 | 0.0 | 2.8 |  |  |  |  |  |  |  |  |
| 5-May-11 | 0.0 | 6.9 |  |  |  |  |  |  |  |  |
| 6-May-11 | 0.0 | 3.5 |  |  |  |  |  |  |  |  |
| 7-May-11 | 0.0 | 6.2 |  |  |  |  |  |  |  |  |
| 8-May-11 | 0.0 | 2.4 |  |  |  |  |  |  |  |  |
| 9-May-11 | 0.0 | 1.4 |  |  |  |  |  |  |  |  |
| 10-May-11 | 0.0 | 5.3 |  |  |  |  |  |  |  |  |
| 11-May-11 | 0.0 | 3.0 |  |  |  |  |  |  |  |  |
| 12-May-11 | 0.0 | 1.9 |  |  |  |  |  |  |  |  |
| 13-May-11 | 0.0 | 4.7 |  |  |  |  |  |  |  |  |
| 14-May-11 | 0.0 | 3.4 |  |  |  |  |  |  |  |  |
| 15-May-11 | 0.0 | 4.0 |  |  |  |  |  |  |  |  |
| 16-May-11 | 0.0 | 1.2 |  |  |  |  |  |  |  |  |
| 17-May-11 | 0.0 | 0.4 |  |  |  |  |  |  |  |  |
| 18-May-11 | 0.0 | 9.7 |  |  |  |  |  |  |  |  |
| 19-May-11 | 0.0 | 10.5 |  |  |  |  |  |  |  |  |
| 20-May-11 | 0.0 | 13.0 |  |  |  |  |  |  |  |  |
| 21-May-11 | 0.0 | 3.0 |  |  |  |  |  |  |  |  |
| 22-May-11 | 0.0 | 7.3 |  |  |  |  |  |  |  |  |
| 23-May-11 | 0.0 | 4.3 |  |  |  |  |  |  |  |  |
| 24-May-11 | 0.0 | 12.1 |  |  |  |  |  |  |  |  |
| 25-May-11 | 0.0 | 12.3 |  |  |  |  |  |  |  |  |
| 26-May-11 | 0.0 | 1.6 |  |  |  |  |  |  |  |  |
| 27-May-11 | 0.0 | 2.0 |  |  |  |  |  |  |  |  |
| 28-May-11 | 0.0 | 1.5 |  |  |  |  |  |  |  |  |
| 29-May-11 | 0.0 | 1.1 |  |  |  |  |  |  |  |  |
| 30-May-11 | 0.0 | 7.1 |  |  |  |  |  |  |  |  |
| 31-May-11 | 0.0 | 6.6 |  |  |  |  |  |  |  |  |
